# Supplementary material for: An ICT-FRET-based fluorescent probe for the ratiometric sensing of hypochlorous acid based on a coumarin–naphthalimide derivative
Source: Royal Society of Chemistry journal article supplement (doi:10.1039/d2nj00491g), 2022-01-01
Supplement: d2nj00491g1.pdf [file d2nj00491g1.pdf]

## Supporting Information

### **An ICT-FRET-based fluorescent probe for ratiometric sensing hypochlorous acid based on a coumarin-naphthalimide derivative**

Lin-Ke Li<sup>a</sup>, Yi-Min Hou<sup>a</sup>, Xiao-Chen Liu<sup>b</sup>, Mei-Ju Tian<sup>a</sup>, Qiu-Juan Ma<sup>a,\*</sup>, Nan-Nan Zhu<sup>a</sup>,  
Shu-Zhen Liu

<sup>a</sup> *School of Pharmacy, Henan University of Chinese Medicine, Zhengzhou 450046, PR China*

<sup>b</sup> *School of Chinese Materia Medica, Beijing University of Chinese Medicine, Beijing 100029,  
PR China*

\*Corresponding author, E-mail: maqiujuan104@126.com (Q. J. Ma); Tel: +86-371-65676656;

Fax: +86-371-65680028.

## Table of contents

|                                      |       |    |
|--------------------------------------|-------|----|
| <b>Figure S1</b>                     | ..... | S3 |
| <b>Figure S2</b>                     | ..... | S4 |
| <b>Figure S3</b>                     | ..... | S5 |
| <b>NMR and MS data for compounds</b> | ..... | S6 |

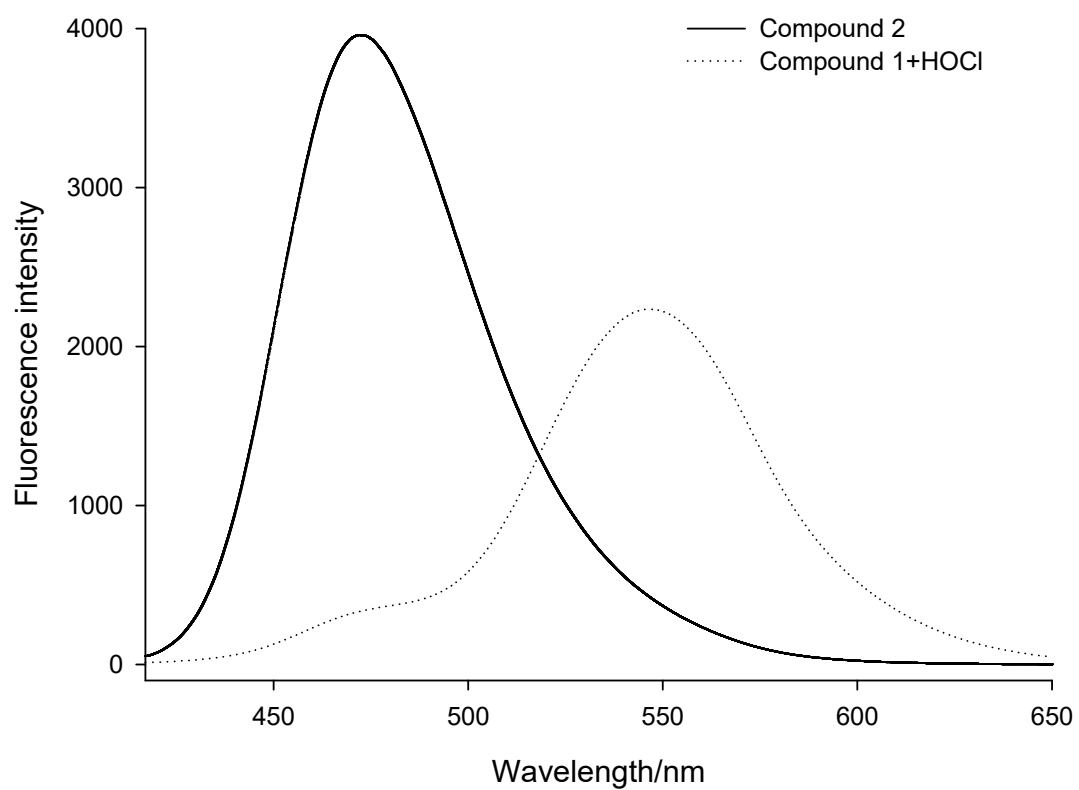

Fig. S1 The fluorescence emission spectra of compound **2** (5.0  $\mu\text{M}$ ) and compound **1** (5.0  $\mu\text{M}$ ) with HOCl (200  $\mu\text{M}$ ).

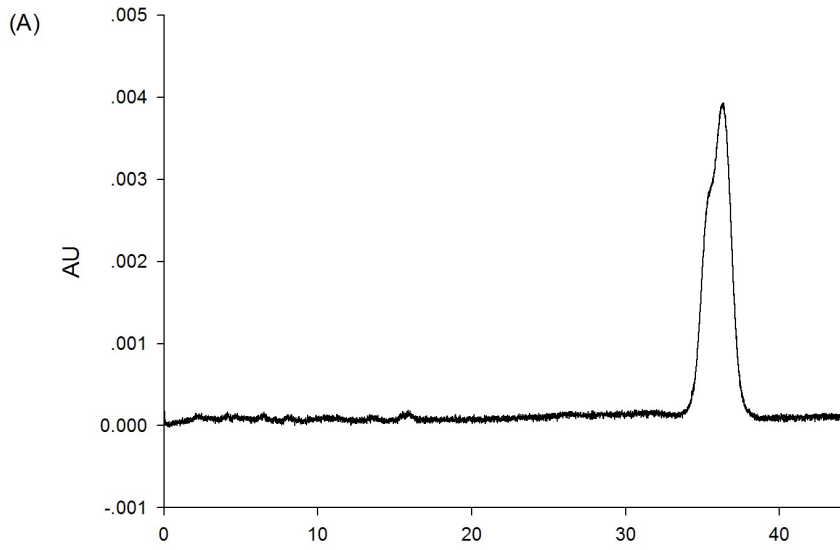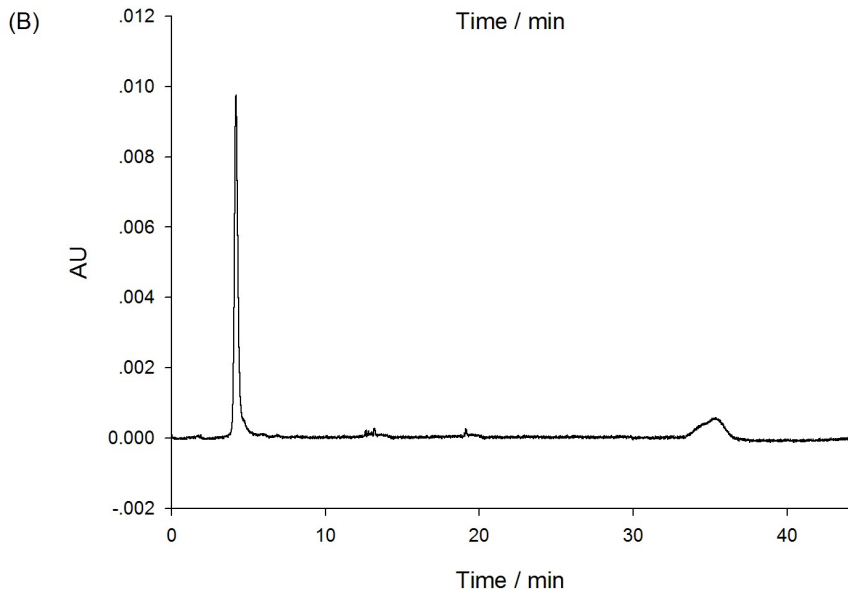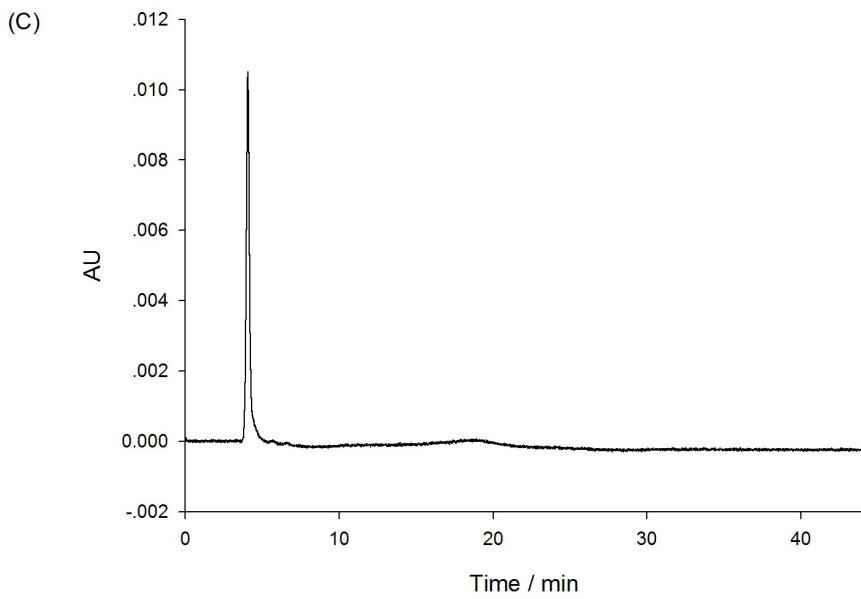

Fig. S2 HPLC profiles of (A) probe **1** (200  $\mu\text{M}$ ) and (B) reaction mixture of probe **1** (20  $\mu\text{M}$ ) with HOCl (500  $\mu\text{M}$ ), and (C) compound **4** (20  $\mu\text{M}$ ). HPLC conditions: total flow rate, 1.0 mL/min; Agela Technologies Venusil XBP C18, 5  $\mu\text{m}$ , 4.6 $\times$ 250 mm, methanol/water=60:40 (V/V), and detection wavelength at 420 nm.

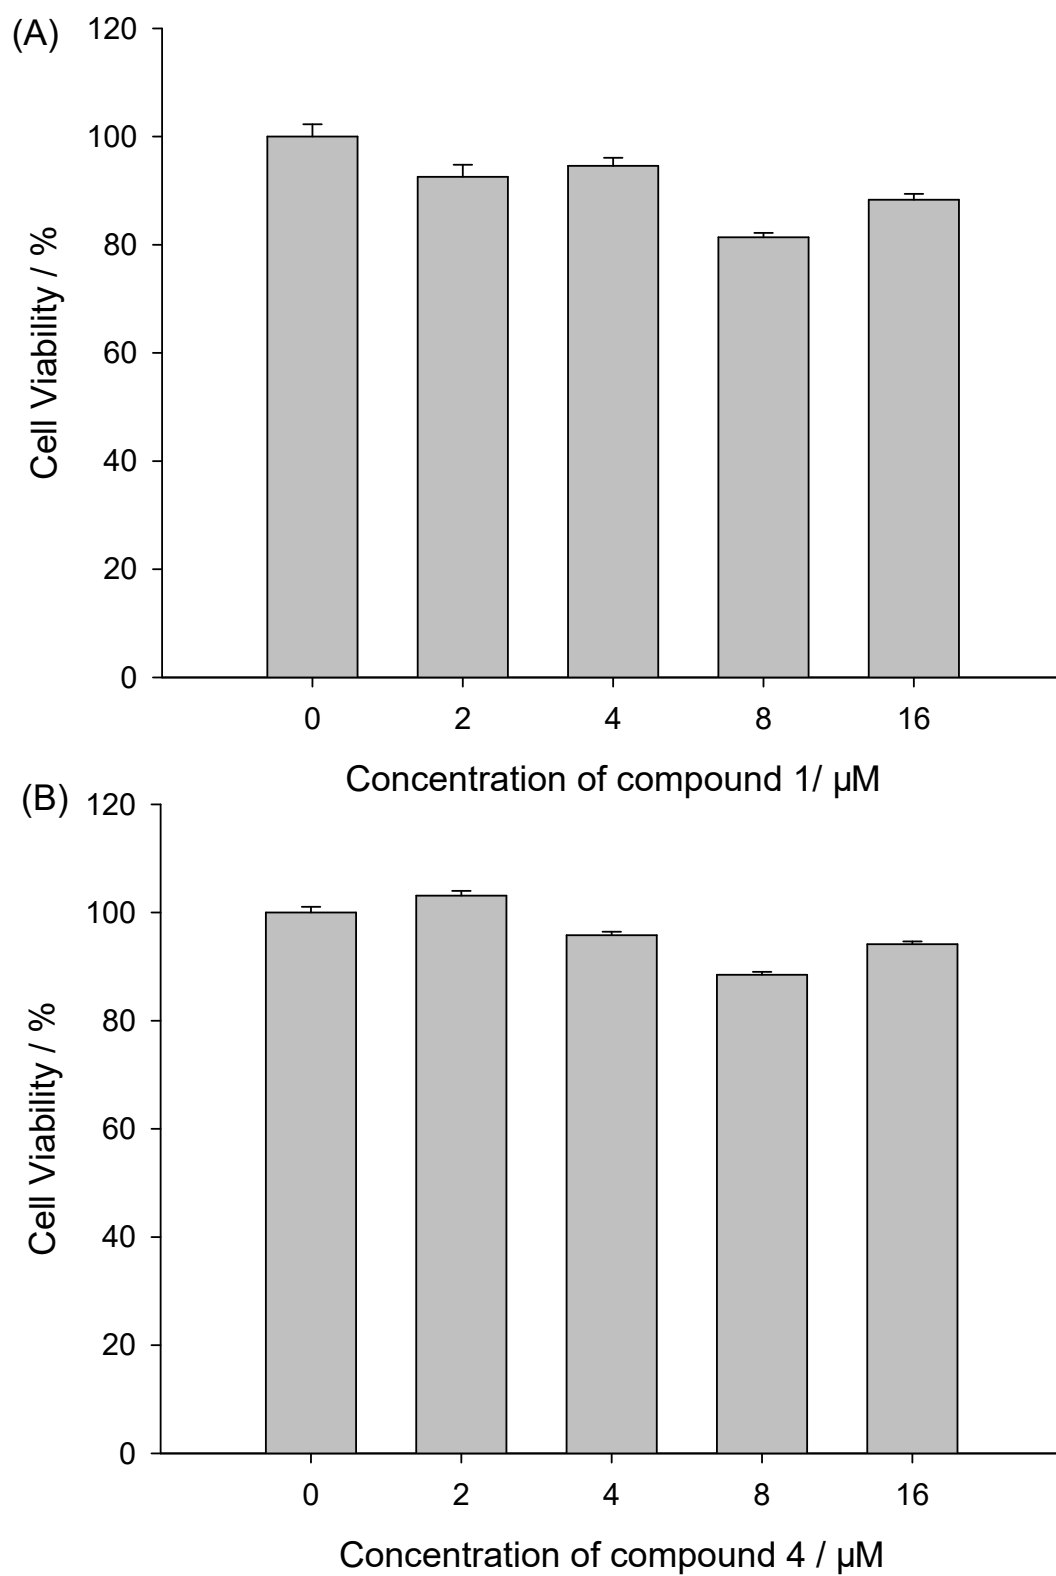

Fig. S3 MTT assay of HeLa cells in the presence of different concentrations of (A) probe **1** and (B) compound **4** (0, 2, 4, 8, 16  $\mu\text{M}$ ) for 12 h at 37  $^{\circ}\text{C}$ .

NMR and MS data for compounds

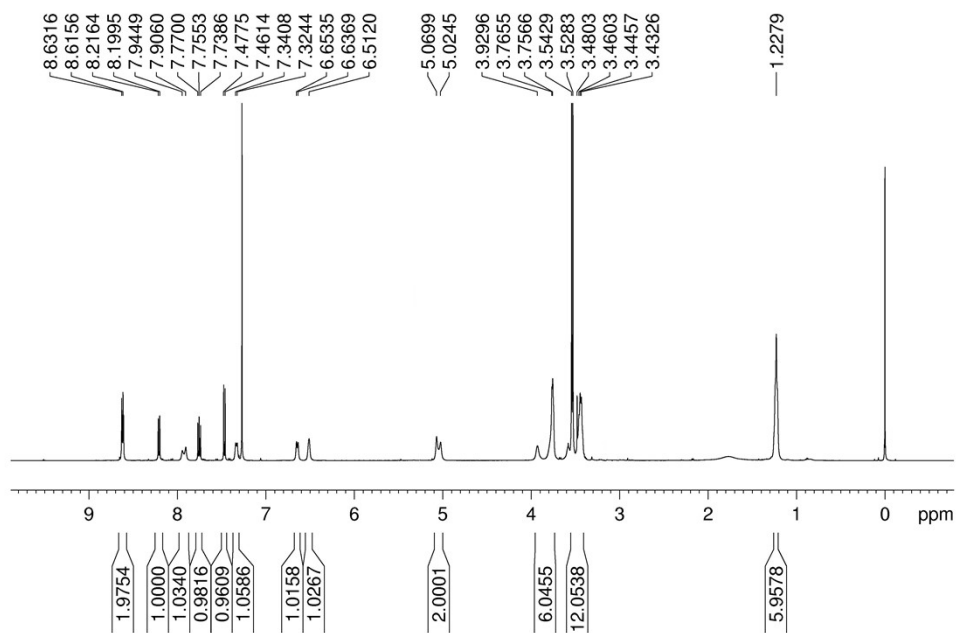

Fig. S4  $^1\text{H}$  NMR spectrum of compound **1** in  $\text{CDCl}_3$ .

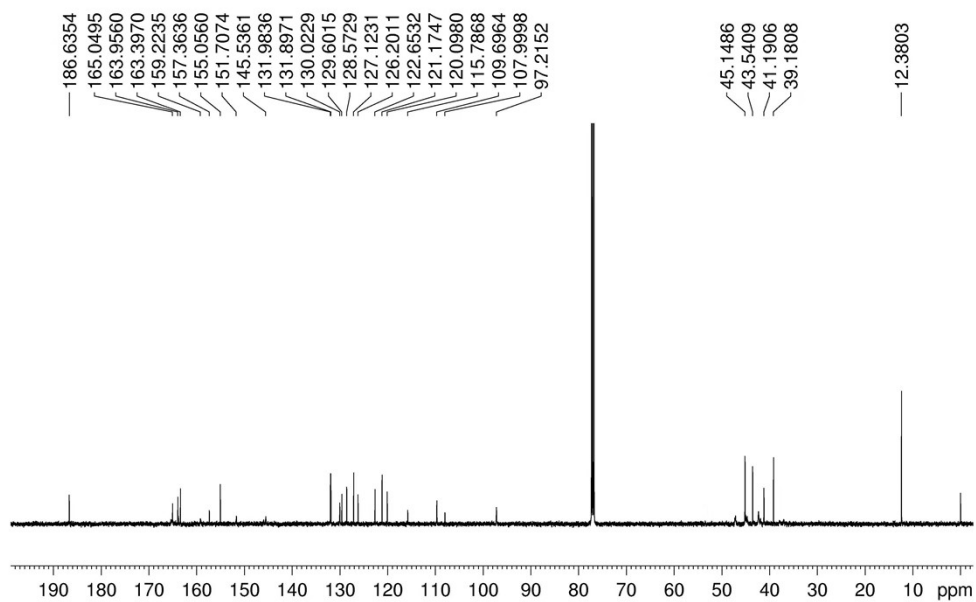

**Fig. S5**  $^{13}\text{C}$  NMR spectrum of compound **1** in  $\text{CDCl}_3$ .



MALAOSHI1 #327-328 RT: 0.76-0.76 AV: 2 NL: 2.99E7  
T: FTMS + p ESI Full ms [569.0000-769.0000]

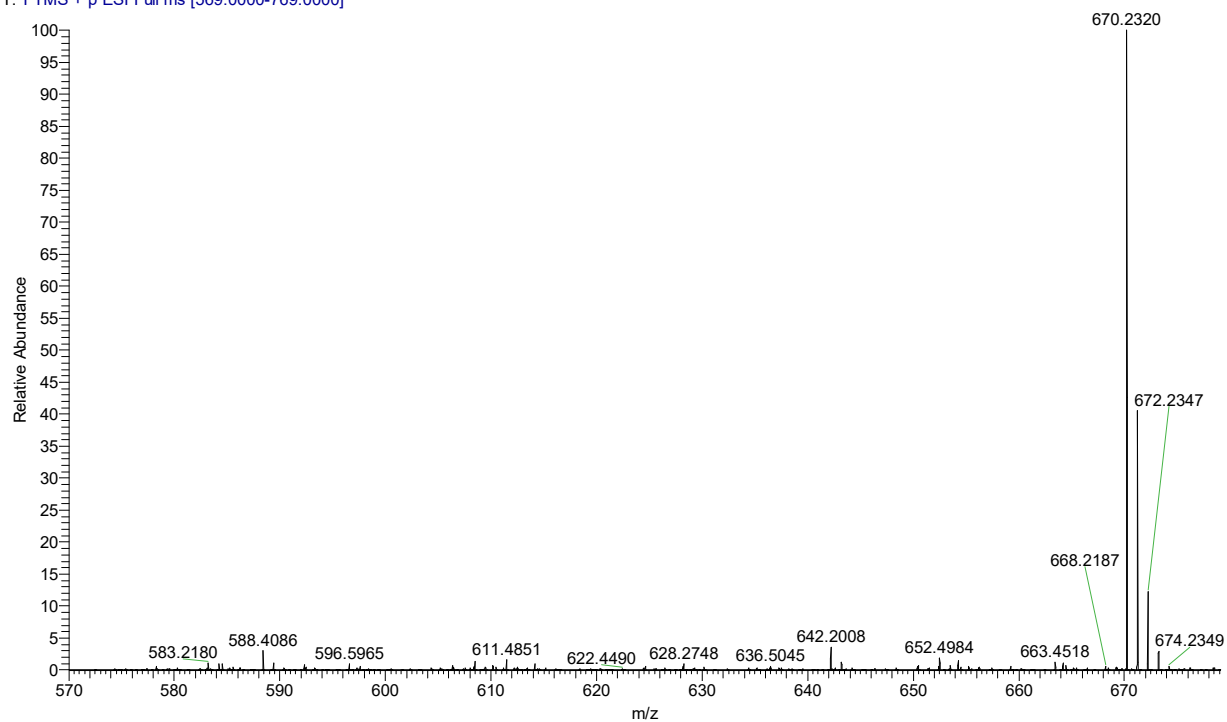

**Fig. S6** ESI-MS of compound **1**.
